# Supplementary material for: Dietary Berberine and Ellagic Acid Supplementation Improve Growth Performance and Intestinal Damage by Regulating the Structural Function of Gut Microbiota and SCFAs in Weaned Piglets
Source: MDPI journal article supplement (doi:10.3390/microorganisms11051254), 2023-05-10
Supplement: s1 [file s1]

**Table S1.** Primer sequences for RT-qPCR

| Target gene    | Forward and reverse | Primer sequence (5'-3') |
|----------------|---------------------|-------------------------|
| Occludin       | Forward primer      | GCTGGAGGAAGACTGGAT      |
|                | Reverse primer      | ATCCGCAGATCCCTTAAC      |
| Claudin-1      | Forward primer      | TACTTTCCTGCTCCTGTC      |
|                | Reverse primer      | AAGGCGTTAATGTCAATC      |
| ZO-1           | Forward primer      | ACCCACCAAACCCACCAA      |
|                | Reverse primer      | CCATCTCTTGCTGCCAAACTATC |
| $\beta$ -actin | Forward primer      | TCTGGCACCACACCTTCT      |
|                | Reverse primer      | TGATCTGGGTCATCTTCTCAC   |
